# Supplementary material for: Visuospatial working memory in behavioural variant frontotemporal dementia: a comparative analysis with Alzheimer's disease using the box task
Source: Springer Nature journal article supplement (doi:10.1007/s00415-024-12406-0), 2024-05-07
Supplement: MOESM1 [file 27064898]

## **Supplementary Material**

### **Visuospatial Working Memory in Behavioural Variant Frontotemporal Dementia: A Comparative Analysis with Alzheimer's Disease using the Box Task**

David Foxe\*, Muireann Irish, James Carrick, Sau Chi Cheung, Her Teng, James R. Burrell, Roy P.C. Kessels, Olivier Piguet

**\*Corresponding author:** David Foxe, Brain & Mind Centre, The University of Sydney, 94 Mallett St, Sydney NSW 2006, Australia

**Email:** david.foxe@sydney.edu.au

## Methods

The chi-square automatic interaction detector (CHAID) method was used to determine the optimal cut-off Box Task performance scores to discriminate bvFTD from AD. To derive a relatively simple decision tree (and as the main measures of the Box Task are the errors scores), the between- and within-search errors (only) at all set sizes were included in the model. Important to the rationale of this analysis is the awareness that the AD and bvFTD patients in this study demonstrate variable overall cognitive function. Accordingly, from a clinical perspective, we deemed it was important to consider the patient's overall cognitive ability before forming clinically relevant cut-off points on the Box Task. We therefore decided to include the ACE-III total score (a measure of overall cognitive ability) as the first forced variables in the model. For the remaining Box Task error variables, the CHAID automatically selected each variable based on its own merit.

## Results

### Performance on neuropsychological tests

Significant group differences were observed on all neuropsychological tests, with the exception of the error measure on Trail Making Test A ( $H(2) = 1.176, p = .555$ ; Supplementary Table 1). Post hoc tests revealed characteristic cognitive profiles of each dementia subtype. Relative to controls, the AD and bvFTD groups displayed impairments on all tests of attention and executive functioning (ACE-III attention and fluency, Digit Span forward and backward, Trails A and B time; Trails B errors: AD, all  $p$ -values  $< .001$ ; bvFTD, all  $p$ -values  $\leq .034$ ), verbal memory (ACE-III memory: AD and bvFTD, both  $p$ -values  $< .001$ ) and language (ACE-III language, SYDBAT tests: AD, all  $p$ -values  $\leq .03$ ; bvFTD, all  $p$ -values  $< .007$ ).

Direct comparison of the patient groups revealed the AD group was more impaired than the bvFTD group on verbal memory (ACE-III memory,  $p = .002$ ) and were slower on measures of attention (Trail A time,  $p = .038$ ) and executive functioning (i.e., rapid set-shifting) (Trails B time,  $p = .040$ ). There were no significant group differences on other measures of attention and executive function and

language (ACE-III attention, fluency, and language, Digit Span forward and backward, SYDBAT subtests: all  $p$ -values  $\geq .088$ ).

**Supplementary Table 1.** Neuropsychological profiles of study participants

|                                                                               | AD          | bvFTD        | Controls    | Group effect (F or H) | p      | Post hoc test (Sidak Corrected) |
|-------------------------------------------------------------------------------|-------------|--------------|-------------|-----------------------|--------|---------------------------------|
| <b><u>Attention, short-term and working memory, executive functioning</u></b> |             |              |             |                       |        |                                 |
| ACE-III attention (18)                                                        | 12.5 (3.3)  | 14.1 (3.5)   | 17.5 (0.8)  | 26.203                | < .001 | AD, bvFTD < Controls            |
| Digit Span forward (16)                                                       | 8.8 (1.5)   | 9 (2.3)      | 11.3 (2.3)  | 12.907                | < .001 | AD, bvFTD < Controls            |
| Digit Span backward (14)                                                      | 4.4 (1.6)   | 4.6 (1.9)    | 7.7 (2.1)   | 29.23                 | < .001 | AD, bvFTD < Controls            |
| Trails A (secs)                                                               | 73.3 (43.5) | 54.3 (22.1)  | 30.9 (7.8)  | 17.345                | < .001 | AD > bvFTD > Controls           |
| Trails A errors                                                               | 0.2 (0.4)   | 0.4 (1)      | 0.1 (0.3)   | 1.176 <sup>^</sup>    | .555   | —                               |
| Trails B (secs)                                                               | 229.5 (118) | 164.5 (92.7) | 75.9 (28.5) | 22.286                | < .001 | AD > bvFTD > Controls           |
| Trails B errors                                                               | 1.7 (1.5)   | 1.6 (2)      | 0.4 (0.8)   | 14.209 <sup>^</sup>   | < .001 | AD, bvFTD > Controls            |
| ACE-III fluency (14)                                                          | 7.9 (2.8)   | 6.8 (3.1)    | 12.1 (1.5)  | 37.169                | < .001 | AD, bvFTD < Controls            |
| <b><u>Verbal memory</u></b>                                                   |             |              |             |                       |        |                                 |
| ACE-III memory (26)                                                           | 12.7 (3.9)  | 16.4 (5.4)   | 24.7 (1.4)  | 76.763                | < .001 | AD < bvFTD < Controls           |
| <b><u>Language</u></b>                                                        |             |              |             |                       |        |                                 |
| ACE-III language (26)                                                         | 22.7 (2.6)  | 22.4 (3)     | 25.4 (1)    | 15.589                | < .001 | AD, bvFTD < Controls            |
| SYDBAT naming (30)                                                            | 22 (4.4)    | 21.6 (4.5)   | 27 (2.1)    | 18.94                 | < .001 | AD, bvFTD < Controls            |
| SYDBAT repetition (30)                                                        | 29.2 (1.7)  | 28.6 (1.9)   | 29.9 (0.3)  | 11.340 <sup>^</sup>   | .003   | AD, bvFTD < Controls            |
| SYDBAT comprehension (30)                                                     | 26.3 (2.4)  | 26.2 (3.5)   | 29.3 (1.1)  | 16.928                | < .001 | AD, bvFTD < Controls            |
| SYDBAT semantic (30)                                                          | 24.6 (3.3)  | 24.3 (3.5)   | 28.4 (1)    | 33.898 <sup>^</sup>   | < .001 | AD, bvFTD < Controls            |

Notes: Values are mean ± standard deviation. <sup>^</sup> = Kruskal-Wallis test with Dunn-Bonferroni correction. Abbreviations: ACE-III: Addenbrooke's Cognitive

Examination—Third edition; AD: Alzheimer's disease; bvFTD: behavioural variant frontotemporal dementia; SYDBAT: The Sydney Language Battery; Trails: Trail

Making Test. Number of missing values: Trails A (secs) = 1 AD; Trails A errors = 1 AD, 1 bvFTD; Trails B (secs) = 11 AD, 6 bvFTD; Trails B errors = 9 AD, 5 bvFTD;

SYDBAT naming = 10 bvFTD, 1 control; SYDBAT repetition = 1 AD, 10 bvFTD; SYDBAT comprehension = 1 AD, 10 bvFTD; SYDBAT semantic = 1 AD, 10 bvFTD.

**Supplementary Table 2.** Generalised estimating equations model of the Box Task between-search errors

|                                    | Wald Chi-Square | df | <i>p</i> -value |
|------------------------------------|-----------------|----|-----------------|
| Intercept                          | 114.687         | 1  | < .001          |
| Diagnosis                          | 48.902          | 2  | < .001          |
| Box level (nested under diagnosis) | 516.463         | 6  | < .001          |
| Box trial (nested under diagnosis) | 18.369          | 3  | < .001          |

Notes, Box level = the number of boxes that the participant has to search (i.e., 4, 6 or 8 boxes). Box trial = the two trials within each box level (i.e., set size).

**Supplementary Table 3.** Generalised estimating equations model of the Box Task within-search errors

|                                    | Wald Chi-Square | df | <i>p</i> -value |
|------------------------------------|-----------------|----|-----------------|
| Intercept                          | 19.725          | 1  | < .001          |
| Diagnosis                          | 3.552           | 2  | .169            |
| Box level (nested under diagnosis) | 19.827          | 6  | .003            |
| Box trial (nested under diagnosis) | 1.296           | 3  | .730            |

Notes, Box level = the number of boxes that the participant must search (i.e., 4, 6 or 8 boxes). Box trial = the two trials within each box level (i.e., set size).

**Supplementary Table 4.** Generalised estimating equations model of the Box Task strategy (i.e., normalised Levenshtein edit distance) scores

|                                    | Wald Chi-Square | df | <i>p</i> -value |
|------------------------------------|-----------------|----|-----------------|
| Intercept                          | 5448.027        | 1  | < .001          |
| Diagnosis                          | 21.114          | 2  | < .001          |
| Box level (nested under diagnosis) | 46.867          | 6  | < .001          |
| Box trial (nested under diagnosis) | 6.84            | 3  | .077            |

Notes, Box level = the number of boxes that the participant must search (i.e., 4, 6 or 8 boxes). Box trial = the two trials within each box level (i.e., set size).

**Supplementary Table 5a and 5b.** Repeated measures mixed model analysis of variance (ANOVA) of the Box Task time scores

5a. Tests of between-subject effects

|           | Type III Sum of Squares | df | Mean Square | F       | Sig.   | Partial Eta Squared |
|-----------|-------------------------|----|-------------|---------|--------|---------------------|
| Intercept | 1679487.319             | 1  | 1679487.319 | 266.398 | > .001 | .758                |
| Diagnosis | 267135.326              | 2  | 133567.663  | 21.186  | > .001 | .333                |
| Error     | 535876.99               | 85 | 6304.435    |         |        |                     |

5b. Tests of Within-Subjects Contrasts

|                          | Average_time | Type III Sum of Squares | df | Mean Square | F       | Sig.   | Partial Eta Squared |
|--------------------------|--------------|-------------------------|----|-------------|---------|--------|---------------------|
| Average_time             | Linear       | 237647.342              | 1  | 237647.342  | 237.436 | > .001 | .736                |
|                          | Quadratic    | 1958.025                | 1  | 1958.025    | 4.306   | .041   | .048                |
| Average_time * Diagnosis | Linear       | 16269.34                | 2  | 8134.67     | 8.127   | .001   | .161                |
|                          | Quadratic    | 415.123                 | 2  | 207.561     | .456    | .635   | .011                |
| Error (Average_time)     | Linear       | 85075.583               | 85 | 1000.889    |         |        |                     |
|                          | Quadratic    | 38652.339               | 85 | 454.733     |         |        |                     |

Notes, Average\_time = the mean time of trial 1 and trial 2 at each set size (i.e., 6-box, 8-box) with the exception of the 4-box set size: this time value is the Trial 2 time (only) score.

**Supplementary Table 6.** Post hoc set size (i.e., box level) comparisons of between-search errors, within-search errors, strategy score, and time in each group

|                              | Group    | Post hoc test (Benjamini-Hochberg corrected) |
|------------------------------|----------|----------------------------------------------|
| <u>Between-search errors</u> | AD       | 4 boxes < 6 boxes < 8 boxes                  |
|                              | bvFTD    | 4 boxes < 6 boxes < 8 boxes                  |
|                              | Controls | 4 boxes < 6 boxes < 8 boxes                  |
| <u>Within-search errors</u>  | AD       | 4 boxes < 6 boxes, 8 boxes                   |
|                              | bvFTD    | -                                            |
|                              | Controls | -                                            |
| <u>Strategy score</u>        | AD       | 4 boxes < 6 boxes, 8 boxes                   |
|                              | bvFTD    | 4 boxes < 6 boxes, 8 boxes                   |
|                              | Controls | 4 boxes < 6 boxes, 8 boxes                   |
| <u>Time (seconds)</u>        | AD       | 4 boxes < 6 boxes < 8 boxes                  |
|                              | bvFTD    | 4 boxes < 6 boxes < 8 boxes                  |
|                              | Controls | 4 boxes < 6 boxes < 8 boxes                  |

Notes: AD = Alzheimer’s disease; bvFTD = behavioural variant frontotemporal dementia; Strategy score = normalised Levenshtein edit distance score. The between-search error, within-search error, and strategy post hoc group comparisons are derived from the generalised estimating equations modelled data. The time post hoc group comparisons are derived from the repeated measures mixed model analysis of variance (ANOVA).

**Supplementary Table 7.** Variables contributing to Box Task 6 set-size between-search error performance in Alzheimer’s disease (AD)

|                            | B      | S.E.  | $\beta$ | p      | Pearson r | Partial |
|----------------------------|--------|-------|---------|--------|-----------|---------|
| (Constant)                 | 5.333  | 3.687 |         | 0.165  |           |         |
| ACE-III visuospatial       | -0.135 | 0.237 | -0.141  | 0.577  | -0.285    | -0.133  |
| RCF copy score             | -0.034 | 0.096 | -0.084  | 0.726  | -0.456    | -0.084  |
| Spatial Span forward       | 0.076  | 0.400 | 0.051   | 0.851  | -0.251    | 0.045   |
| Spatial Span backward      | 0.011  | 0.324 | 0.009   | 0.973  | -0.358    | 0.008   |
| RCF 3-minute recall        | -0.443 | 0.194 | -0.436  | 0.035* | -0.413    | -0.475  |
| Trails A (time)            | 0.030  | 0.015 | 0.392   | 0.070  | 0.413     | 0.413   |
| Trails A (errors)          | -0.250 | 1.851 | -0.030  | 0.894  | 0.311     | -0.032  |
| Trails B-A time difference | 0.015  | 0.011 | 0.398   | 0.214  | 0.349     | 0.291   |
| Trails B (errors)          | -0.198 | 0.740 | -0.077  | 0.792  | 0.310     | -0.063  |

Notes,  $\beta$  = estimated b-values for the model, Partial = partial correlation coefficient, Pearson r = Pearson correlation coefficient, S.E. = estimated standard error,  $\beta$  = beta standardised coefficients, \* =  $p < .05$ .

**Supplementary Table 8.** Variables contributing to Box Task 6 set-size between-search error performance in behavioural variant frontotemporal dementia (bvFTD)

|                            | B      | S.E.  | $\beta$ | p     | Pearson r | Partial |
|----------------------------|--------|-------|---------|-------|-----------|---------|
| (Constant)                 | 7.437  | 9.038 |         | 0.421 |           |         |
| ACE-III visuospatial       | -0.351 | 0.582 | -0.126  | 0.554 | -0.537    | -0.141  |
| RCF copy score             | 0.023  | 0.167 | 0.039   | 0.892 | -0.471    | 0.032   |
| Spatial Span forward       | -0.420 | 0.493 | -0.209  | 0.405 | -0.579    | -0.197  |
| Spatial Span backward      | -0.271 | 0.563 | -0.157  | 0.636 | -0.580    | -0.113  |
| RCF 3-minute recall        | 0.017  | 0.106 | 0.029   | 0.871 | -0.270    | 0.039   |
| Trails A (time)            | 0.088  | 0.043 | 0.469   | 0.053 | 0.627     | 0.438   |
| Trails A (errors)          | 0.413  | 0.656 | 0.102   | 0.537 | 0.086     | 0.147   |
| Trails B-A time difference | -0.003 | 0.004 | -0.177  | 0.467 | 0.213     | -0.173  |
| Trails B (errors)          | 0.395  | 0.425 | 0.175   | 0.365 | 0.422     | 0.214   |

Notes,  $\beta$  = estimated b-values for the model, Partial = partial correlation coefficient, Pearson r = Pearson correlation coefficient, S.E. = estimated standard error,  $\beta$  = beta standardised coefficients.



**Supplementary Table 9.** Areas Under the Receiver Operator Characteristic Curves (AUC) of all tests at classifying behavioural variant frontotemporal dementia (bvFTD) from Alzheimer’s disease (AD) patients

| Test                                   | AUC     | S.E.M. | Asymptotic Sig. |
|----------------------------------------|---------|--------|-----------------|
| RCF 3-minute recall                    | 0.771** | 0.066  | 0.001           |
| Box Task 4 boxes time                  | 0.759** | 0.065  | 0.001           |
| Box Task 6 boxes between-search errors | 0.747** | 0.067  | 0.002           |
| Box Task 6 boxes time                  | 0.740** | 0.067  | 0.002           |
| Box Task 4 boxes between-search errors | 0.728** | 0.068  | 0.003           |
| RCF copy time                          | 0.723** | 0.072  | 0.006           |
| ACE-III memory                         | 0.704** | 0.073  | 0.009           |
| Box Task 6 boxes within-search errors  | 0.702*  | 0.071  | 0.01            |
| Spatial Span backward                  | 0.682*  | 0.072  | 0.02            |
| Trails B time                          | 0.675   | 0.09   | 0.064           |
| Box Task 8 boxes time                  | 0.663   | 0.073  | 0.036           |
| ACE-III visuospatial                   | 0.658   | 0.074  | 0.043           |
| Box Task 8 boxes within-search errors  | 0.643   | 0.074  | 0.066           |
| ACE-III attention                      | 0.636   | 0.076  | 0.08            |
| Spatial Span forward                   | 0.614   | 0.076  | 0.145           |
| Trails A time                          | 0.612   | 0.076  | 0.152           |
| Box Task 8 boxes between-search errors | 0.591   | 0.077  | 0.245           |
| SYDBAT repetition                      | 0.574   | 0.092  | 0.41            |
| SYDBAT semantic                        | 0.560   | 0.091  | 0.504           |
| SYDBAT naming                          | 0.544   | 0.090  | 0.625           |
| RCF copy                               | 0.533   | 0.081  | 0.682           |
| Box Task 4 boxes strategy              | 0.530   | 0.078  | 0.700           |
| SYDBAT comprehension                   | 0.493   | 0.096  | 0.933           |
| Within-search errors 4 boxes           | 0.491   | 0.078  | 0.909           |
| ACE-III language                       | 0.485   | 0.079  | 0.844           |
| Box Task 8 boxes strategy              | 0.483   | 0.079  | 0.831           |
| Box Task 6 boxes strategy              | 0.448   | 0.078  | 0.507           |
| ACE-III verbal fluency                 | 0.411   | 0.077  | 0.255           |

Notes: \*  $p < .05$ ; \*\*  $p < .01$ ; S.E.M. = standard error of the mean. The Box Task variables are the average score of trial 1 and 2. The Box Task error and time scores Abbreviations: ACE-III: Addenbrooke’s Cognitive Examination–Third edition; Letter fluency: Letters F, A, S. RCF: Rey Complex Figure; Spatial Span: Spatial Span from the Wechsler Memory Scale-Third Edition; SYDBAT: The Sydney Language Battery; Trails: Trail Making Test. Number of missing values: RCF copy score: 3 AD; RCF copy time: 3

AD, 1 bvFTD; RCF 3-minute recall: 3 AD; SYDBAT all subtests: 2 AD, 10 bvFTD; Trails A time: 1 AD; Trails  
B time: 11 AD, 6 bvFTD.

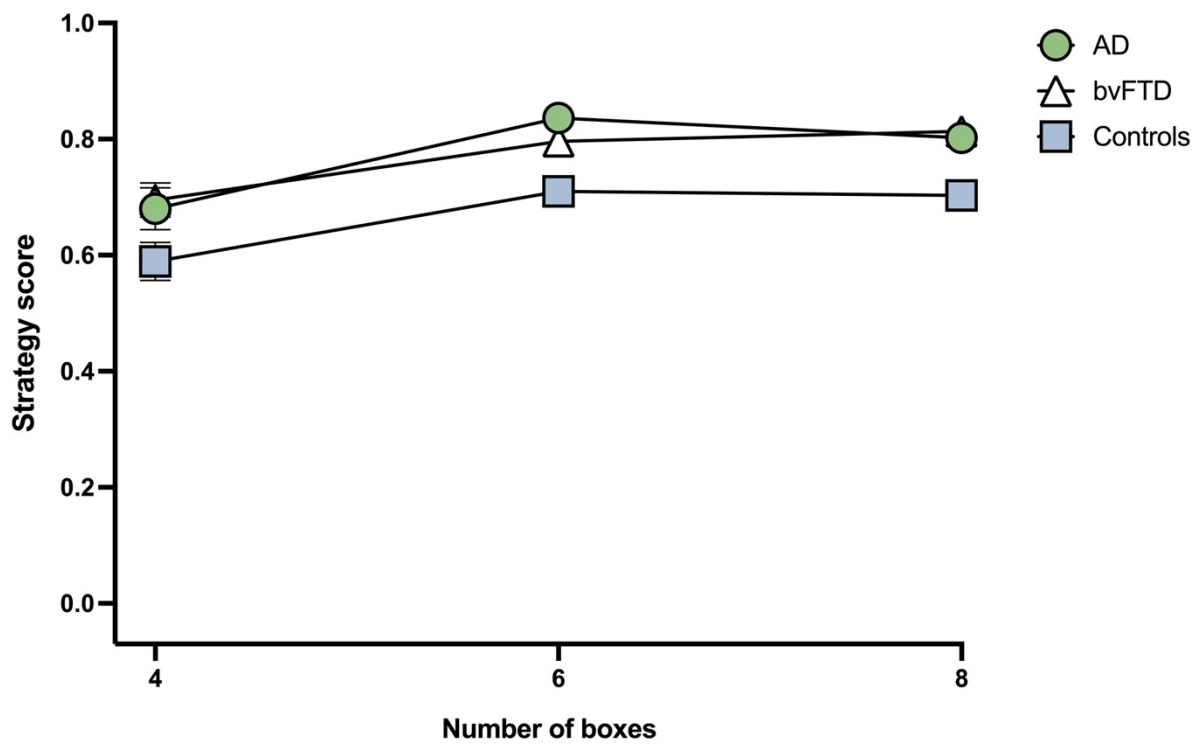

**Supplementary Figure 1.** Normalised Levenshtein edit distance (i.e., strategy) scores in behavioural variant frontotemporal dementia (bvFTD), Alzheimer’s disease (AD) patients, and healthy controls.

Notes: Values are derived from the generalised estimating equations modelled data. It is assumed lower distance scores denote a more proficient strategy to complete the task.

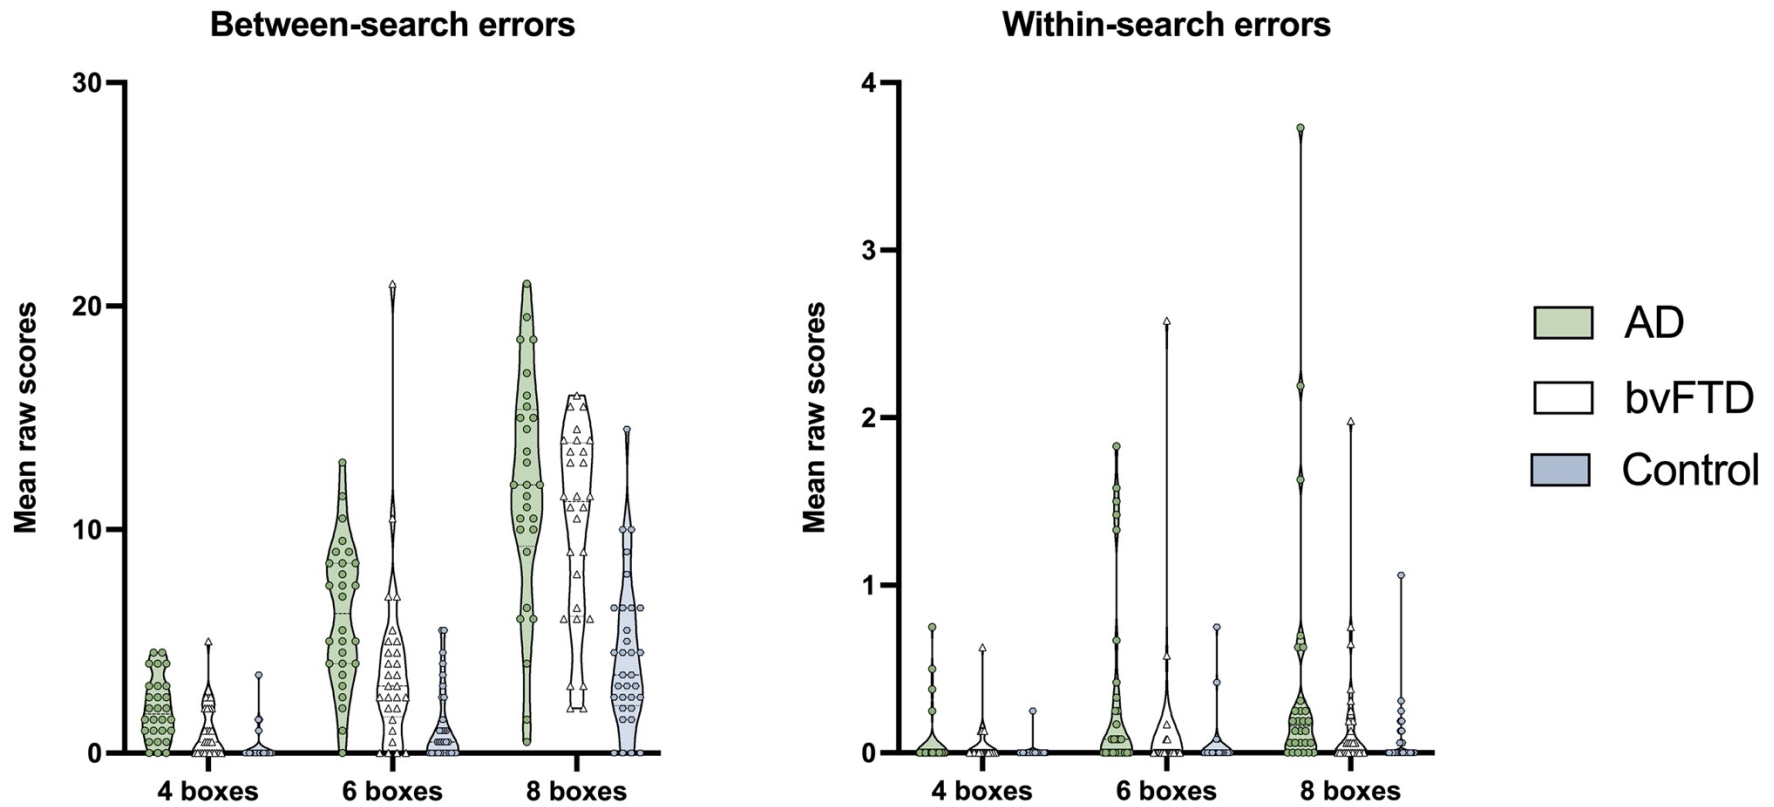

**Supplementary Figure 2.** Raw between-search and within-search error scores on the Box Task.

Note, scatterplots represent the participants mean error score over Trials 1 and 2.
